# Supplementary figures and images for: Metabolic effects of TiO2 nanoparticles, a common component of sunscreens and cosmetics, on human keratinocytes
Source: PubMed Central journal article supplement — Cell Death Dis. 2013 Mar 21;4(3):e549–. doi: 10.1038/cddis.2013.76 (PMC3615742; doi:10.1038/cddis.2013.76), 2013-03-21

**A**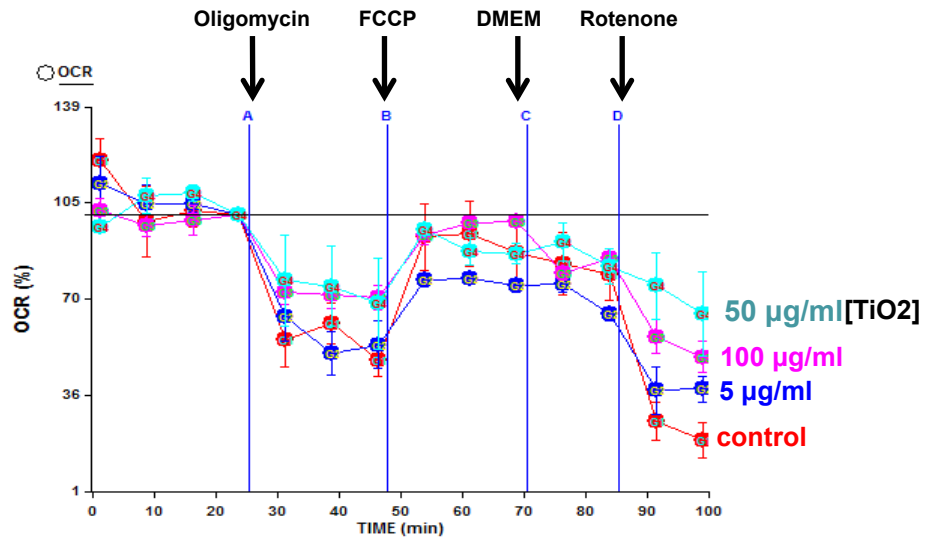**B**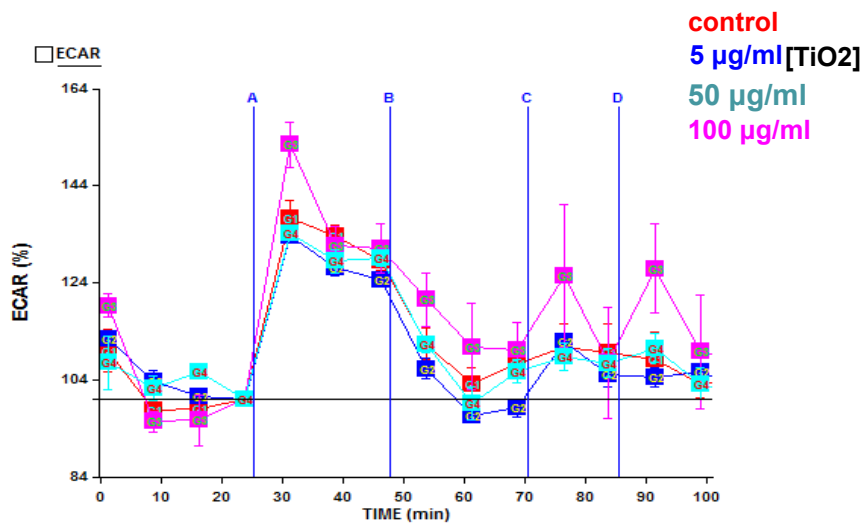

Supplement: cddis201376x1.pdf [file cddis201376x1.pdf]

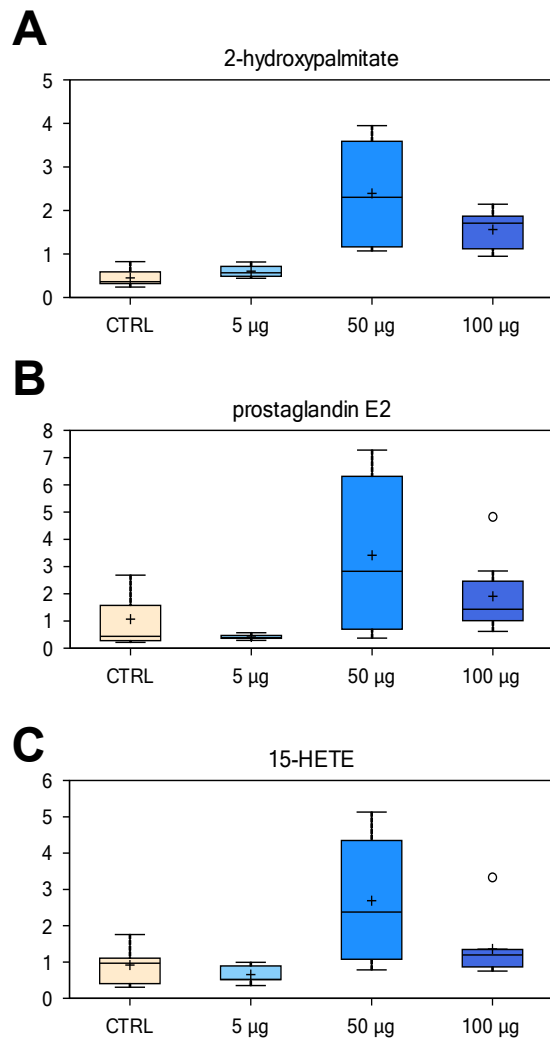

Supplementary Figure 2, Reproduction 200%

Supplement: cddis201376x2.pdf [file cddis201376x2.pdf]
